# Supplementary material for: Transition Metal Ions as Ozonation Catalysts: An Alternative Process of Heterogeneous Catalytic Ozonation
Source: MDPI journal article supplement (doi:10.3390/catal11091091), 2021-09-10
Supplement: s1 [file s1]

Archive with 1 entries (1 files):
- catalysts-1371467-supplementary.pdf
