# Supplementary material for: Transition Metal Ions as Ozonation Catalysts: An Alternative Process of Heterogeneous Catalytic Ozonation
Source: MDPI journal article supplement (doi:10.3390/catal11091091), 2021-09-10
Supplement: s1 [file s1 › catalysts-1371467-supplementary.pdf]

## **Supporting Information**

### **Transition metal ions as ozonation catalysts: an alternative process of heterogeneous catalytic ozonation**

Savvina Psaltou <sup>1</sup>, Konstantina Sioumpoura <sup>2</sup>, Efthimia Kaprara <sup>2</sup>, Manassis Mitrakas<sup>2</sup>, and Anastasios Zouboulis<sup>1,\*</sup>

<sup>1</sup>Laboratory of Chemical and Environmental Technology, Department of Chemistry, Aristotle University, Thessaloniki, Greece; [spsaltou@chem.auth.gr](mailto:spsaltou@chem.auth.gr); [zoubouli@chem.auth.gr](mailto:zoubouli@chem.auth.gr)

<sup>2</sup>Laboratory of Analytical Chemistry, Department of Chemical Engineering, Aristotle University, Thessaloniki, Greece; [kaprara@auth.gr](mailto:kaprara@auth.gr); [ksioumpou@cheng.auth.gr](mailto:ksioumpou@cheng.auth.gr); [mmitraka@auth.gr](mailto:mmitraka@auth.gr)

\* Correspondence: [zoubouli@chem.auth.gr](mailto:zoubouli@chem.auth.gr)

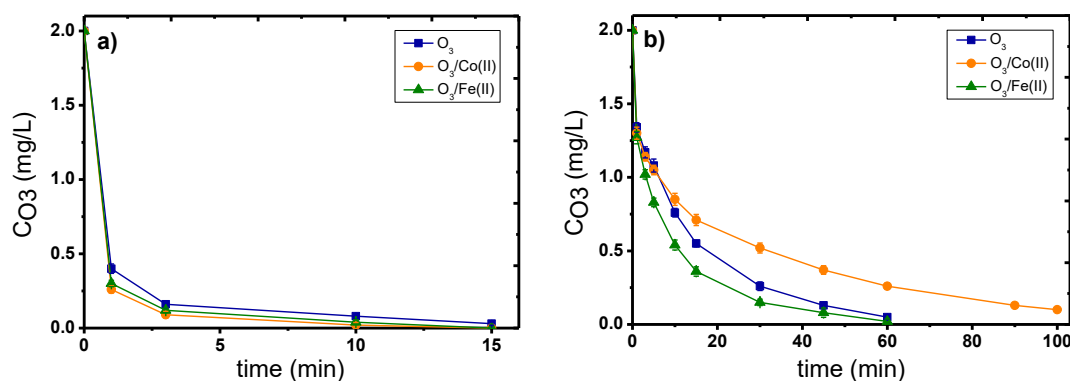

**Figure S1.** Ozone decomposition during catalytic ozonation of p-CBA with the use of Fe(II) and Co(II) as catalysts in (a) deionized water, and (b) dechlorinated tap water. Experimental conditions: initial p-CBA concentration 0.5 mg/L, ozone concentration 2 mg/L, catalyst concentration 1 mg/L, pH 7.8, Temp.  $23 \pm 2^\circ \text{C}$ . (Data are the averages of the values obtained in independent experiments conducted in triplicate and the error bars represent the standard deviation of them).

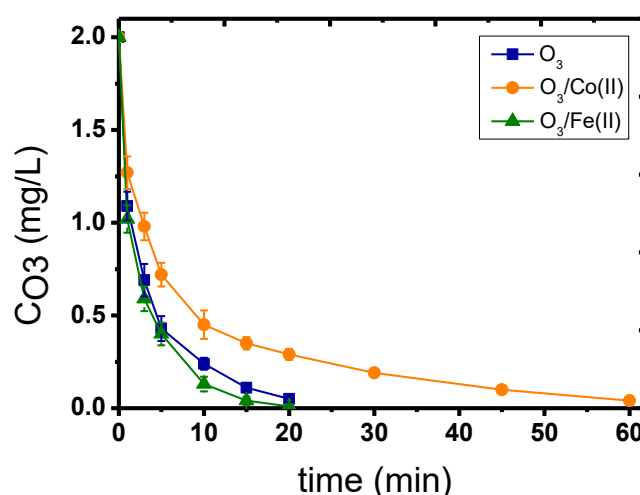

**Figure S2.** Ozone decomposition during catalytic ozonation of benzotriazole with the use of Fe(II) and Co(II) as catalysts in dechlorinated tap water. Experimental conditions: initial benzotriazole concentration 0.5 mg/L, ozone concentration 2 mg/L, catalyst concentration 1 mg/L, pH 7.8, Temp.  $23 \pm 2^\circ \text{C}$ . (Data are the averages of the values obtained in independent experiments conducted in triplicate and the error bars represent the standard deviation of them).

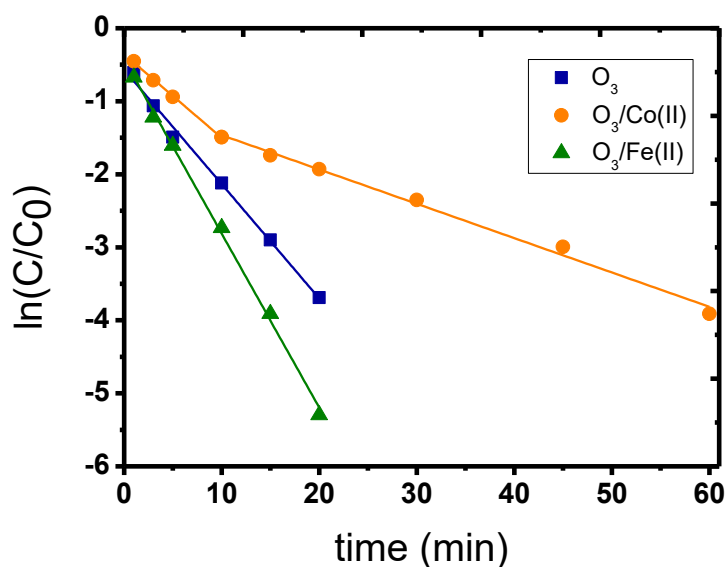

**Figure S3.** 1<sup>st</sup> order kinetic model of ozone decomposition during the ozonation of benzotriazole in dechlorinated tap water experiments. Experimental conditions: initial benzotriazole concentration 0.5 mg/L, ozone concentration 2 mg/L, catalyst concentration 1 mg/L, pH 7.8, Temp. 23±2° C.

**Table S1.** Parameters of 1<sup>st</sup> order kinetic model of ozone decomposition during the ozonation of benzotriazole in dechlorinated tap water. Experimental conditions: initial benzotriazole concentration 0.5 mg/L, ozone concentration 2 mg/L, catalyst concentration 1 mg/L, pH 7.8, Temp. 23±2° C.

| Catalyst | Time (min) | 1 <sup>st</sup> order kinetic constant (min <sup>-1</sup> ) | Equation         | R <sup>2</sup> |
|----------|------------|-------------------------------------------------------------|------------------|----------------|
| /        | 1-20       | 0.156                                                       | y= -0.156x-0.569 | 0.994          |
| Co(II)   | 1-10       | 0.114                                                       | y= -0.114x-0.357 | 0.998          |
| Co(II)   | 10-60      | 0.047                                                       | y=-0.047x-0.993  | 0.993          |
| Fe(II)   | 1-20       | 0.238                                                       | y=-0.238x-0.428  | 0.998          |

**Table S2.** Iron and cobalt concentration in different time intervals with and without the addition of ozone.

| [Fe] (mg/L) |                            |                            |
|-------------|----------------------------|----------------------------|
| Time (h)    | [O <sub>3</sub> ] = 0 mg/L | [O <sub>3</sub> ] = 2 mg/L |
| 0           | 1                          | 1                          |
| 0.5         | 0.1                        | 0.1                        |
| 1           | 0.05                       | 0.07                       |
| 4           | 0.03                       | 0.02                       |
| 24          | 0.02                       | 0                          |

  

| [Co] (mg/L) |                            |                            |
|-------------|----------------------------|----------------------------|
| Time (h)    | [O <sub>3</sub> ] = 0 mg/L | [O <sub>3</sub> ] = 2 mg/L |
| 0           | 1                          | 1                          |
| 0.5         | 1                          | 1                          |
| 1           | 1                          | 1                          |
| 4           | 1                          | 1                          |
| 24          | 1                          | 1                          |

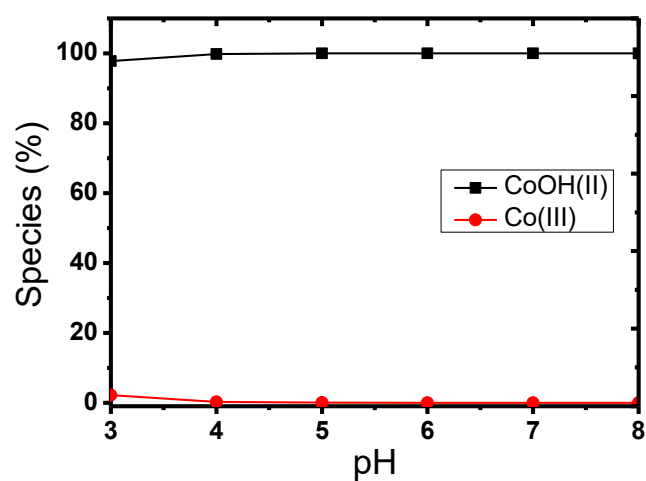

**Figure S4.** Soluble species of Co(III) for the initial metal ion concentration 1 mg/L in different pH values and in aqueous solutions.

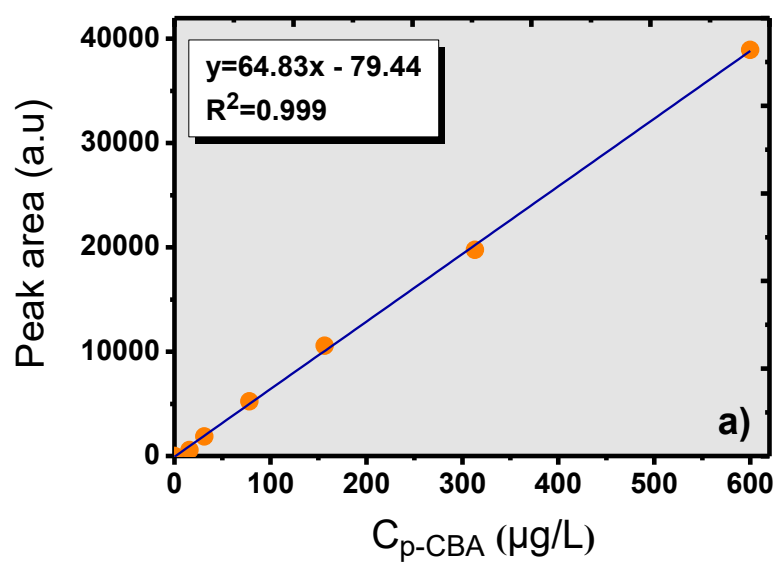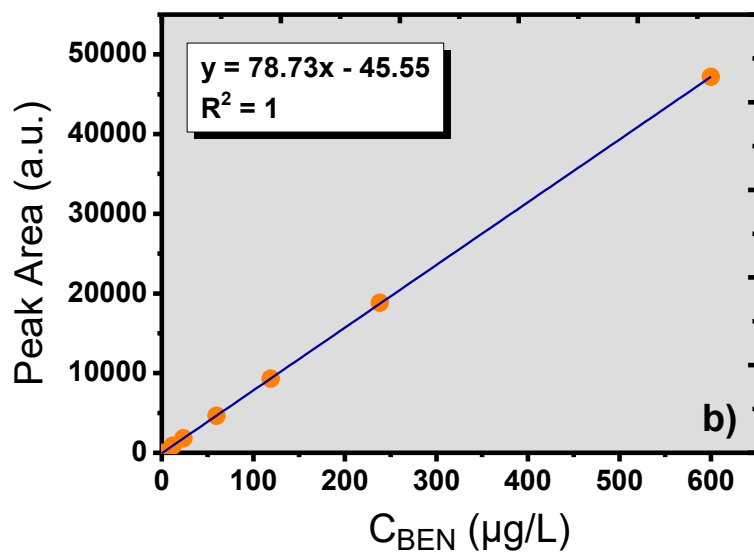

**Figure S5.** Linear response for the determination of (a) p-CBA and (b) benzotriazole concentrations (by HPLC) in the concentration range 0-600  $\mu\text{g/L}$ .
